# Supplementary material for: Excellent n-type light emitters based on AIE-active silole derivatives for efficient simplified organic light-emitting diodes
Source: Royal Society of Chemistry journal article supplement (doi:10.1039/c7tc05062c), 2017-12-01
Supplement: c7tc05062c1.pdf [file c7tc05062c1.pdf]

## *Electronic Supplementary Information (ESI)*

### **Materials and Instrumentations**

Tetrahydrofuran (THF) was distilled from sodium benzophenone ketyl under dry nitrogen immediately prior to use. Chemicals and reagents were purchased from commercial sources and used as received without further purification. Compounds **1a** and **1b**<sup>1</sup>, **3** and **4**<sup>2</sup> were prepared according to the known procedures. The final products were subjected to vacuum sublimation to further improve purity before photoluminescence (PL) and electroluminescence (EL) properties investigations. <sup>1</sup>H and <sup>13</sup>C NMR spectra were measured on a Bruker AV 500 spectrometer in proper deuterated solvents using tetramethylsilane (TMS;  $\delta = 0$ ) as internal reference at room temperature. High resolution mass spectra (HRMS) were recorded on a GCT premier CAB048 mass spectrometer operating in a MALDI-TOF mode. UV-vis absorption spectra were measured on a SHIMADZU UV-2600 spectrophotometer. Photoluminescence spectra were recorded on a Horiba Fluoromax-4 fluorescence spectrophotometer. Photoluminescence quantum yields were measured using a Hamamatsu absolute PL quantum yield spectrometer C11347 Quantaaurus\_QY. The fluorescence lifetimes were determined by the compact fluorescence lifetime spectrometer C11367 of Hamamatsu. Thermogravimetric analysis (TGA) analysis was carried out on a TA TGA Q5000 under dry nitrogen at a heating rate of 20 °C min<sup>-1</sup>. Differential scanning calorimetry (DSC) analysis was performed on a DSC Q1000 under dry nitrogen at a heating rate of 10 °C min<sup>-1</sup>. Cyclic voltammogram (CV) was measured in a solution of tetra-*n*-butylammonium hexafluorophosphate (Bu<sub>4</sub>NPF<sub>6</sub>) (0.1 M) in acetonitrile, using Hg/Hg<sub>2</sub>Cl<sub>2</sub> and platinum wire as reference and counter electrode, respectively, at a scan rate of 50 mV s<sup>-1</sup>. A platinum electrode coated with thin molecule film was used as the

---

working electrode. The frontier orbitals of the molecules based on the ground state geometries were calculated using the density function theory (DFT) method at the level of B3LYP/6-31G(d) by Gaussian 09 program.

## Synthesis

*2,2'-((1,1-Dimethyl-3,4-diphenyl-1H-silole-2,5-diyl)bis(4,1-phenylene))bis(1-phenyl-1H-benzo[d]imidazole) [(PBI)<sub>2</sub>DMTPS]*: According to the known procedures, compounds **1a**<sup>1</sup> and **3**<sup>2</sup> were firstly prepared. A solution of lithium naphthalenide (LiNaph) was prepared by stirring a mixture of naphthalene (1.28 g, 10 mmol) and lithium granular (0.07 g, 10 mmol) in dry THF (30 mL) for 4 h at room temperature under nitrogen. A solution of **1a** (0.65 g, 2.5 mmol) in THF (20 mL) was then added into the solution of LiNaph, and the resultant mixture was stirred for 1 h at room temperature. After the solution was cooled to -10 °C, ZnCl<sub>2</sub>-TMEDA (3.2 g, 12.5 mmol) and 20 mL of THF were added. The fine suspension was stirred for 1 h at room temperature, and Pd(PPh<sub>3</sub>)<sub>2</sub>Cl<sub>2</sub> (105 mg, 0.15 mmol) and **3** (1.28 g, 6 mmol) were then added. After refluxed for 12 h, the reaction mixture was cooled to room temperature and terminated by addition of 1 M hydrochloric acid. The mixture was poured into water and extracted with dichloromethane. The organic layer was washed successively with aqueous sodium chloride solution and water, and dried over anhydrous magnesium sulfate. After filtration, the solvent was evaporated under reduced pressure and the residue was purified by silica-gel column chromatography using *n*-hexane/dichloromethane as eluent. (PBI)<sub>2</sub>DMTPS was obtained as green solid in 63% yield. <sup>1</sup>H NMR (500 MHz, CD<sub>2</sub>Cl<sub>2</sub>), δ (TMS, ppm): 7.79 (d, *J* = 7.9 Hz, 2H), 7.55–7.42 (m, 6H), 7.34–7.27 (m, 10H), 7.26–7.20 (m, 4H), 7.05–6.96 (m, 6H), 6.87–6.82 (m, 4H), 6.81–6.75 (m, 4H), 0.45 (s, 6H). <sup>13</sup>C NMR (125 MHz, CD<sub>2</sub>Cl<sub>2</sub>), δ (TMS, ppm): 156.18, 153.50, 143.05, 142.58, 139.87, 138.63, 138.37, 131.17, 131.08, 130.25, 129.92, 129.75, 128.74, 128.70, 127.71, 124.38, 124.05, 120.70, 111.65, -3.05. HRMS (C<sub>56</sub>H<sub>42</sub>N<sub>4</sub>Si): *m/z* 798.3197 (M<sup>+</sup>, calcd 798.3179).

---

*2,2'-((1-Methyl-1,3,4-triphenyl-1H-silole-2,5-diyl)bis(4,1-phenylene))bis(1-phenyl-1H-benzo[d]imidazole) [(PBI)<sub>2</sub>MPPS]*: The procedure was analogous to that described for (PBI)<sub>2</sub>DMTPS. Green solid, yield 55%. <sup>1</sup>H NMR (500 MHz, CD<sub>2</sub>Cl<sub>2</sub>), δ (TMS, ppm): 7.75 (d, *J* = 8.0 Hz, 2H), 7.66–7.62 (m, 2H), 7.51–7.41 (m, 7H), 7.39–7.36 (m, 2H), 7.30–7.16 (m, 14H), 7.10–6.98 (m, 6H), 6.89–6.83 (m, 4H), 6.81–6.75 (m, 4H), 0.80 (s, 3H). <sup>13</sup>C NMR (125 MHz, CD<sub>2</sub>Cl<sub>2</sub>), δ (TMS, ppm): 156.48, 152.17, 143.19, 140.74, 140.58, 138.54, 137.36, 137.08, 134.55, 129.84, 129.69, 128.83, 128.68, 128.34, 128.30, 127.51, 127.34, 126.56, 122.98, 122.63, 119.45, 110.26, –6.93. HRMS (C<sub>61</sub>H<sub>44</sub>N<sub>4</sub>Si): *m/z* 860.3367 (M<sup>+</sup>, calcd 860.3335).

*2,2'-((1,1-Dimethyl-3,4-diphenyl-1H-silole-2,5-diyl)bis(4,1-phenylene))bis(1-phenyl-1H-phenanthro[9,10-d]imidazole) [(PPI)<sub>2</sub>DMTPS]*: The procedure was analogous to that described for (PBI)<sub>2</sub>DMTPS. Yellowish green solid, yield 53%. <sup>1</sup>H NMR (500 MHz, CD<sub>2</sub>Cl<sub>2</sub>), δ (TMS, ppm): 8.82 (d, *J* = 4.9 Hz, 4H), 8.76 (d, *J* = 7.4 Hz, 2H), 7.83–7.61 (m, 10H), 7.55–7.54 (m, 6H), 7.40–7.38 (m, 4H), 7.32–7.29 (m, 2H), 7.23–7.21 (m, 2H), 7.11–7.07 (m, 6H), 6.91–6.85 (m, 8H), 0.51 (s, 6H). <sup>13</sup>C NMR (125 MHz, CD<sub>2</sub>Cl<sub>2</sub>), δ (TMS, ppm): 154.73, 150.79, 141.69, 140.55, 138.85, 138.70, 137.33, 130.08, 129.89, 129.71, 129.09, 129.02, 128.74, 128.52, 128.15, 127.79, 127.43, 127.31, 127.22, 126.34, 126.26, 125.46, 124.77, 124.01, 123.12, 122.47, 120.87, –4.34. HRMS (C<sub>72</sub>H<sub>50</sub>N<sub>4</sub>Si): *m/z* 998.3839 (M<sup>+</sup>, calcd 998.3805).

*2,2'-((1-Methyl-1,3,4-triphenyl-1H-silole-2,5-diyl)bis(4,1-phenylene))bis(1-phenyl-1H-phenanthro[9,10-d]imidazole) [(PPI)<sub>2</sub>MPPS]*: The procedure was analogous to that described for (PBI)<sub>2</sub>DMTPS. Yellowish green solid, yield 44%. <sup>1</sup>H NMR (500 MHz, CD<sub>2</sub>Cl<sub>2</sub>), δ (TMS, ppm): 8.81–8.77 (m, *J* = 8.9 Hz, 4H), 8.74 (d, *J* = 8.3 Hz, 2H), 7.77–7.74 (m, *J* = 7.5 Hz, 2H), 7.69–7.65 (m, 6H), 7.62–7.59 (m, *J* = 7.4 Hz, 4H), 7.56–7.46 (m, 7H), 7.44–7.41 (m, 2H), 7.30–7.27 (m, 6H), 7.20–7.18 (m, 2H), 7.15–7.06 (m, 6H), 6.91 (d, *J* = 6.9 Hz, 4H), 6.81 (d, *J* = 8.3 Hz, 4H), 0.84 (s, 3H). <sup>13</sup>C NMR (125 MHz, CD<sub>2</sub>Cl<sub>2</sub>), δ (TMS, ppm): 156.33, 150.70, 140.49, 140.08, 138.76, 138.65, 137.29, 134.57, 130.04, 129.86, 129.66, 129.03, 128.99, 128.64, 128.62, 128.30, 128.12, 127.87, 127.52, 127.20,

---

126.52, 126.23, 125.44, 124.75, 123.98, 123.08, 122.44, 120.85, -6.88. HRMS (C<sub>77</sub>H<sub>52</sub>N<sub>4</sub>Si): *m/z* 1060.3927 (M<sup>+</sup>, calcd 1060.3961).

### **Preparation of Nanoaggregates**

Stock THF solutions of the silole derivatives with a concentration of 10<sup>-4</sup> M were prepared. Aliquots of the stock solution were transferred to 10 mL volumetric flasks. After appropriate amounts of THF were added, water was added dropwise under vigorous stirring to furnish 10<sup>-5</sup> M solutions with different water contents (0–90 vol %). The PL measurements of the resultant solutions were then performed immediately.

### **Device Fabrication**

Glass substrates pre-coated with a 90 nm thin layer of indium tin oxide (ITO) with a sheet resistance of 20 Ω per square were thoroughly cleaned in ultrasonic bath of acetone, isopropyl alcohol, detergent, deionized water, and isopropyl alcohol and treated with O<sub>2</sub> plasma for 20 min in sequence. Organic layers were deposited onto the ITO-coated substrates by high-vacuum (<5 × 10<sup>-6</sup> Torr) thermal evaporation. The organic films, LiF and aluminum were deposited successively according to the OLED configurations, and their deposition rates were 1~2 Å s<sup>-1</sup>, 0.1 Å s<sup>-1</sup> and 3~5 Å s<sup>-1</sup>, respectively. The active area of the devices was 3 mm × 3 mm. EL spectra were taken by an optical analyzer, Photo Research PR705. The current density and luminance versus driving voltage characteristics were measured by a Keithley 2420 combined with a Konica Minolta chromameter CS-200 and they were recorded simultaneously. All measurements were done at room temperature under ambient conditions.







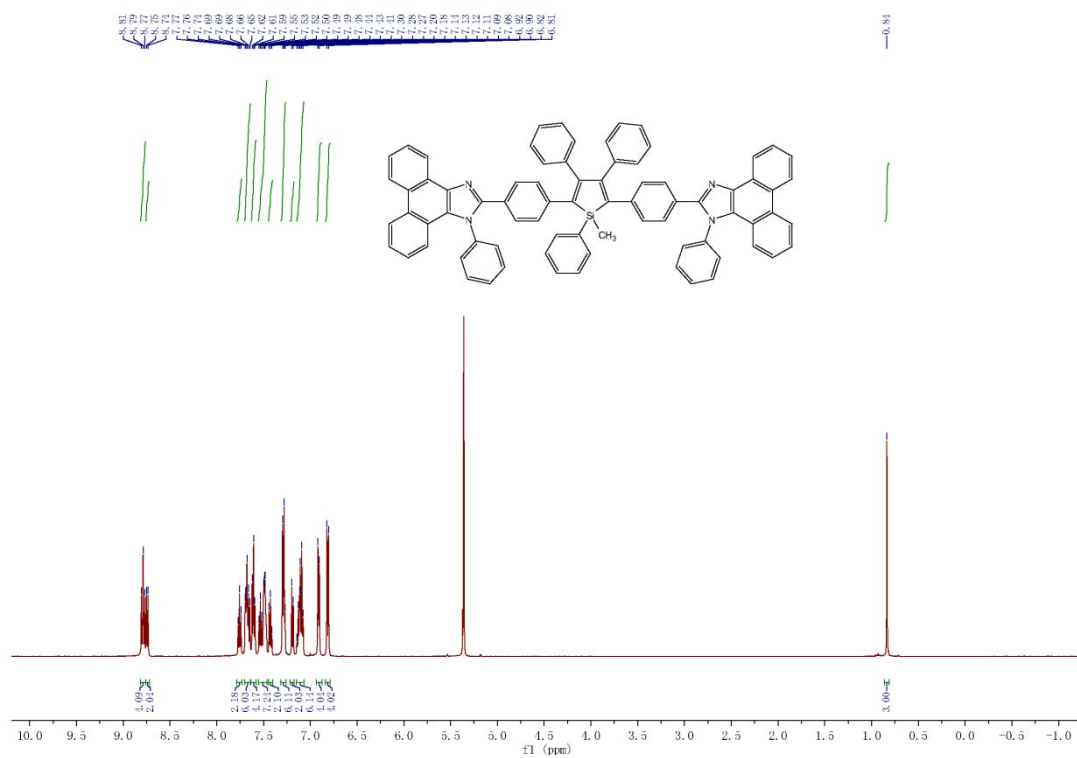

**Fig. S7** <sup>1</sup>H NMR of (PPI)<sub>2</sub>MPPS in CD<sub>2</sub>Cl<sub>2</sub>.

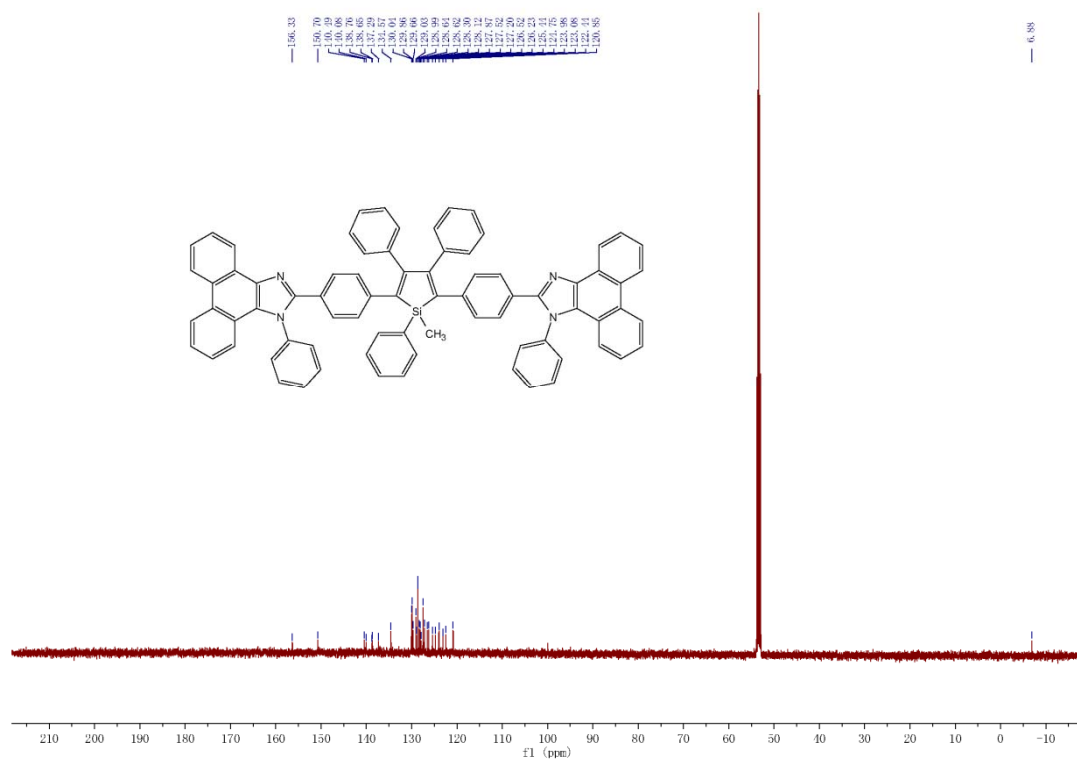

**Fig. S8** <sup>13</sup>C NMR of (PPI)<sub>2</sub>MPPS in CD<sub>2</sub>Cl<sub>2</sub>.



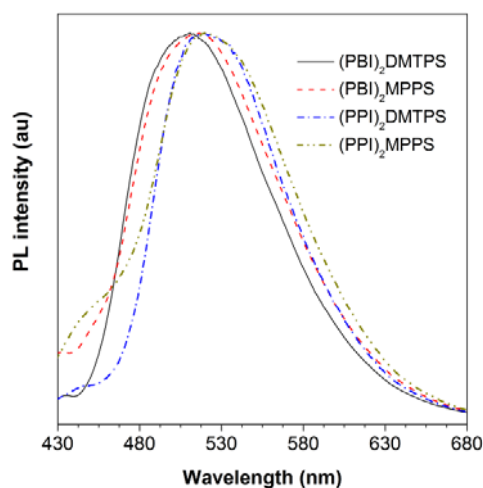

**Fig. S9** PL spectra in THF solutions ( $10^{-5}$  M) of the silole derivatives.

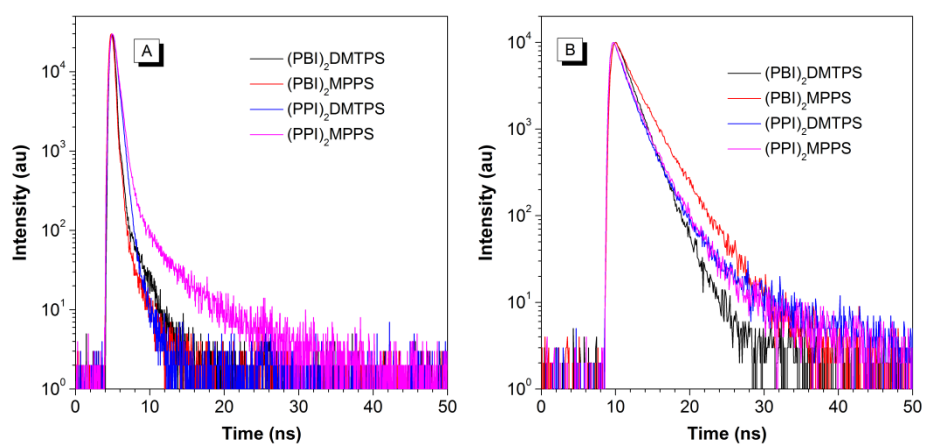

**Fig. S10** Fluorescence decay curves of the silole derivatives in (A) THF solutions ( $10^{-5}$  M) and (B) solid films.

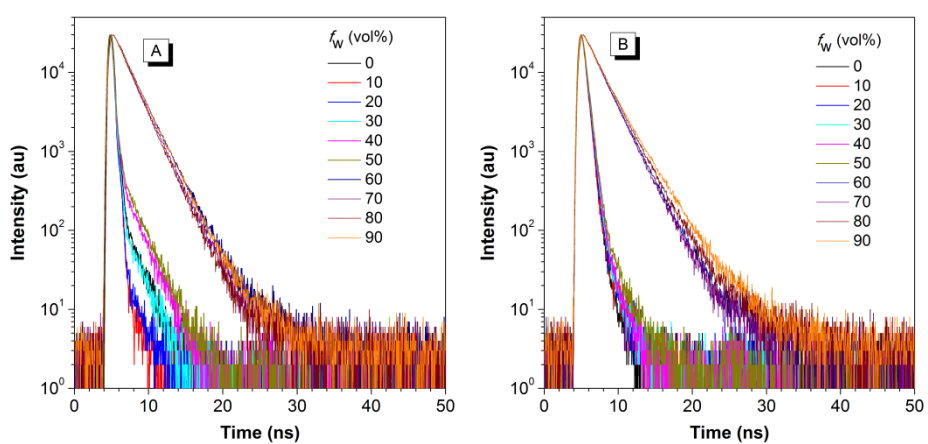

**Fig. S11** Fluorescence decay curves of (A)  $(\text{PBI})_2\text{DMTPS}$  and (B)  $(\text{PPI})_2\text{DMTPS}$  in THF/water mixtures ( $10^{-5}$  M) with different water fractions ( $f_w$ ).

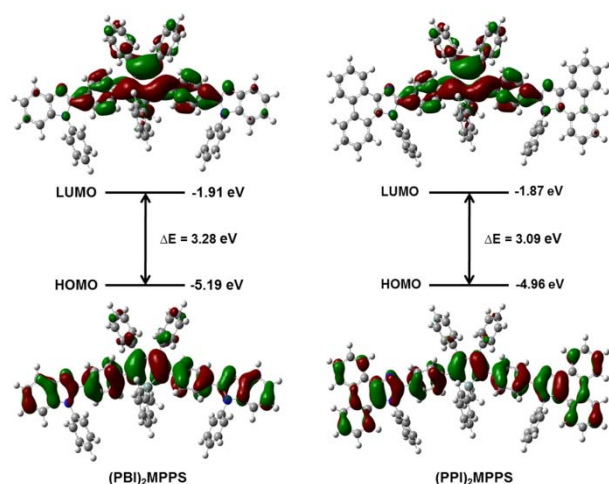

**Fig. S12** Calculated molecular orbital amplitude plots and energy levels of HOMOs and LUMOs of (PBI)<sub>2</sub>MPPS and (PPI)<sub>2</sub>MPPS.

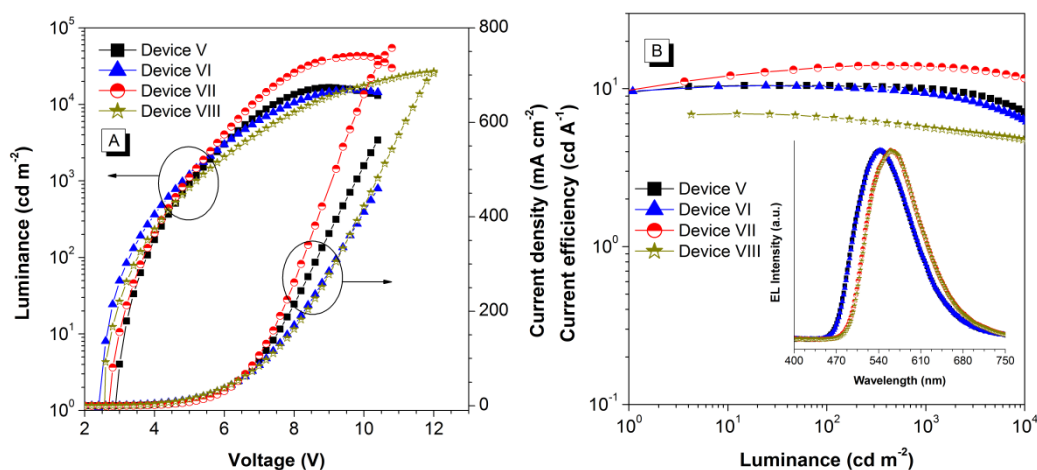

**Fig. S13** (A) Luminance-voltage-current density characteristics and (B) changes in current efficiency with the luminance of Device V-VIII. Inset of (B): EL spectra of Device V-VIII.

## Reference

- 1 Z. Zhao, S. Chen, J. W. Y. Lam, C. K. W. Jim, C. Y. K. Chan, Z. Wang, P. Lu, H. S. Kwok, Y. Ma and B. Z. Tang, *J. Phys. Chem. C*, 2010, **114**, 7963.
- 2 S. Zhuang, R. Shanguan, J. Jin, G. Tu, L. Wang, J. Chen, D. Ma and X. Zhu, *Org. Electron.*, 2012, **13**, 3050.
